# Supplementary material for: Prevalence and Characteristics of Metabolic Hyperferritinemia in a Population-Based Central-European Cohort
Source: MDPI journal article supplement (doi:10.3390/biomedicines12010207), 2024-01-17
Supplement: s1 [file s1]

## Supplementary material

Table S1: Main characteristics in total numbers, percentages (%) or median and interquartile range (IQR) for the affirmation cohort. Abbreviations: HF hyperferritinemia, BMI body mass index, Waist waist circumference, ALT alanine transaminase, AST aspartate transaminase, Gamma GT Gamma-glutamyltransferase, ALP alkaline phosphatase, HDL high-density lipoprotein, LDL low-density lipoprotein, TG triglycerides, Hb blood hemoglobin, WBC white blood cells, PLT platelets. The asterisk (\*) denotes significant difference between the non-HF and the HF group at  $p < 0.05$

|                              | Non-HF           | HF all grades (n = 857)  |                  |                  |
|------------------------------|------------------|--------------------------|------------------|------------------|
|                              | n = 5567         | HF 1 (n = 774)           | HF 2 (n = 79)    | HF 3 (n = 4)     |
| <b>Age 40-49 years</b>       | 26% (n = 1461)   | All grades 17% (n = 145) |                  |                  |
|                              |                  | 17% (n = 133)            | 15% (n = 12)     | 0% (n = 0)       |
| <b>Age 50 – 59 years</b>     | 45% (n = 2501)   | All grades 44% (n = 375) |                  |                  |
|                              |                  | 43% (n = 334)            | 48% (n = 38)     | 75% (n = 3)      |
| <b>Age 60-69 years</b>       | 26% (n = 1438)   | All grades 36% (n = 307) |                  |                  |
|                              |                  | 36% (n = 280)            | 33% (n = 26)     | 25% (n = 1)      |
| <b>Age ≥ 70 years</b>        | 3% (n = 159)     | All grades 4% (n = 30)   |                  |                  |
|                              |                  | 3% (n = 27)              | 4% (n = 3)       | 0% (n = 0)       |
| <b>Male*</b>                 | 45% (n = 481)    | All grades 69% (n = 590) |                  |                  |
|                              |                  | 66% (n = 510)            | 96% (n = 76)     | 100% (n = 4)     |
| <b>Female*</b>               | 55% (n = 3086)   | All grades 31% (n = 267) |                  |                  |
|                              |                  | 34% (n = 264)            | 4% (n = 3)       | 0% (n = 0)       |
| <b>BMI kg/m2*</b>            | 26 (23-29)       | 28 (25-31)               | 29 (26-32)       | 30 (28-31)       |
| <b>Alcohol g/d*</b>          | 6 (2-15)         | 11 (4-21)                | 13 (4-27)        | 31 (15-38)       |
| <b>ALT U/l*</b>              | 21 (16-28)       | 29 (22-39)               | 38 (28-60)       | 86 (52-164)      |
| <b>AST U/l*</b>              | 22 (19-26)       | 25 (21-31)               | 30 (25-42)       | 65 (38-112)      |
| <b>GammaGT U/l*</b>          | 21 (15-33)       | 32 (22-50)               | 41 (27-62)       | 126 (86-384)     |
| <b>ALP U/l*</b>              | 63 (53-75)       | 65 (55-77)               | 64 (50-76)       | 76 (64-92)       |
| <b>HDL mg/dl*</b>            | 62 (51-75)       | 54 (45-66)               | 46 (40-52)       | 58 (43-68)       |
| <b>LDL mg/dl*</b>            | 139 (116-164)    | 148 (125-170)            | 138 (114-172)    | 144 (118-179)    |
| <b>TG mg/dl*</b>             | 94 (69-131)      | 120 (90-170)             | 165 (125-229)    | 216 (134-284)    |
| <b>Hgb g/dl*</b>             | 14.2 (13.5-15.1) | 14.9 (14.1-15.6)         | 15.2 (14.7-16.0) | 15.8 (14.8-16.7) |
| <b>WBC 10<sup>9</sup>/L*</b> | 5.8 (4.9-6.8)    | 6.1 (5.1-7.2)            | 5.7 (5.1-6.8)    | 5.6 (5.2-7.0)    |
| <b>PLT 10<sup>9</sup>/L*</b> | 248 (214-283)    | 239 (207-273)            | 208 (172-234)    | 212 (192-236)    |

Table S2: Presence of fulfilled metabolic criteria within the HF and non-HF groups in percentages and numbers for the affirmation cohort. Abbreviations: HF hyperferritinemia. The p-value indicates significant difference between the non-HF and the HF group at  $p < 0.05$

|                                     | Affirmation cohort<br>n = 6424 | HF all grades n = 857    |                |               | Non-HF<br>n = 5567 | p-value           |
|-------------------------------------|--------------------------------|--------------------------|----------------|---------------|--------------------|-------------------|
|                                     |                                | HF 1<br>n = 774          | HF 2<br>n = 79 | HF 3<br>n = 4 |                    |                   |
| <b>Fulfilled metabolic criteria</b> | 60%<br>n = 3878                | All grades 84% (n = 719) |                |               | 57%<br>n = 3159    | <b>&lt; 0.001</b> |
|                                     |                                | 83%<br>n = 641           | 94%<br>n = 74  | 100%<br>n = 4 |                    |                   |

Table S3: Presence of major or minor metabolic characteristics within the different groups in percentages and numbers for the affirmation cohort. Numbers for the minor criteria are counted in the remaining subjects after application of the major criteria. Abbreviations: HF hyperferritinemia. The p-value indicates significant difference between the non-HF and the HF group at  $p < 0.05$

| MAJOR CRITERIA WITHIN THE AFFIRMATION COHORT |                              |                                 |                |               |                              |                   |
|----------------------------------------------|------------------------------|---------------------------------|----------------|---------------|------------------------------|-------------------|
|                                              | Study cohort<br>n = 6424     | HF all grades n = 857           |                |               | Non-HF<br>n = 5567           | p-value           |
|                                              |                              | HF 1<br>n = 774                 | HF 2<br>n = 79 | HF 3<br>n = 4 |                              |                   |
| Presence of a major criterion                | 36%<br>n = 2282              | All grades 63% (n = 540)        |                |               | 31%<br>n = 1742              | <b>&lt; 0.001</b> |
|                                              |                              | 61%<br>n = 472                  | 81%<br>n = 64  | 100%<br>n = 4 |                              |                   |
| MINOR CRITERIA WITHIN THE REMAINING COHORT   |                              |                                 |                |               |                              |                   |
|                                              | Remaining cohort<br>n = 4142 | Remaining HF all grades n = 317 |                |               | Remaining non Hf<br>N = 3825 | p-value           |
|                                              |                              | HF 1<br>n = 302                 | HF 2<br>n = 15 | HF 3<br>n = 0 |                              |                   |
| Presence of $\geq$ 2 minor criteria          | 39%<br>n = 1596              | All grades 56% (n = 179 of 317) |                |               | 37%<br>n = 1417              | <b>&lt; 0.001</b> |
|                                              |                              | 53%<br>n = 169                  | 3%<br>n = 10   | 0%<br>n = 0   |                              |                   |

Supplementary Table S4: subgroup analysis of the general characteristics for the Non-HF-group and the HF 1 group, numbers represent median and interquartile range (IQR).

|                        | Non-HF (N=8,527) | HF 1 (N=1,225)   | p-value |
|------------------------|------------------|------------------|---------|
| ages                   | 55 (49-61)       | 58 (52-64)       | <0.001  |
| BMI kg/m2              | 25 (23-29)       | 28 (25-31)       | <0.001  |
| Waist cm               | 92 (83-100)      | 99 (92-107)      | <0.001  |
| Alcohol g/d            | 7 (2-17)         | 13 (4-27)        | <0.001  |
| ALT U/l                | 21 (16-28)       | 28 (21-39)       | <0.001  |
| AST U/l                | 22 (19-27)       | 25 (21-31)       | <0.001  |
| GammaGT U/l            | 21 (15-32)       | 32 (22-51)       | <0.001  |
| ALP U/l                | 63 (53-75)       | 65 (56-77)       | <0.001  |
| HDL mg/l               | 63 (52-75)       | 55 (46-68)       | <0.001  |
| LDL mg/l               | 139 (115-164)    | 148 (124-171)    | <0.001  |
| TG mg/dl               | 94 (69-132)      | 118 (89-167)     | <0.001  |
| Hgb g/dl               | 14.2 (13.4-15.0) | 14.9 (14.1-15.6) | <0.001  |
| WBC 10 <sup>9</sup> /L | 5.8 (4.9-6.9)    | 6.1 (5.1-7.2)    | <0.001  |
| PLT 10 <sup>9</sup> /L | 247 (213-283)    | 237 (205-271)    | <0.001  |

Supplementary Table S5: subgroup analysis of the general characteristics for the Non-HF-group and the HF groups 2 and 3 combined, numbers represent median and interquartile range (IQR).

|                        | Non-HF (N=8,527) | HF 1+2 (N=163)   | p-value |
|------------------------|------------------|------------------|---------|
| Ages                   | 55 (49-61)       | 58 (52-64)       | <0.001  |
| BMI kg/m2              | 25 (23-29)       | 29 (26-32)       | <0.001  |
| Waist cm               | 92 (83-100)      | 102 (96-112)     | <0.001  |
| Alcohol g/d            | 7 (2-17)         | 17 (6-34)        | <0.001  |
| ALT U/l                | 21 (16-28)       | 38 (28-58)       | <0.001  |
| AST U/l                | 22 (19-27)       | 30 (24-42)       | <0.001  |
| GammaGT U/l            | 21 (15-32)       | 48 (30-81)       | <0.001  |
| ALP U/l                | 63 (53-75)       | 64 (52-79)       | 0.45    |
| HDL mg/l               | 63 (52-75)       | 49 (42-57)       | <0.001  |
| LDL mg/l               | 139 (115-164)    | 142 (117-173)    | 0.095   |
| TG mg/dl               | 94 (69-132)      | 163 (118-219)    | <0.001  |
| Hgb g/dl               | 14.2 (13.4-15.0) | 15.2 (14.7-16.1) | <0.001  |
| WBC 10 <sup>9</sup> /L | 5.8 (4.9-6.9)    | 6.0 (5.3-7.1)    | 0.005   |
| PLT 10 <sup>9</sup> /L | 247 (213-283)    | 209 (179-241)    | <0.001  |
